# Supplementary material for: In vivo evaluation of integrin αvβ6-targeting peptide in NSCLC and brain metastasis
Source: Frontiers journal article supplement (doi:10.3389/fonc.2023.1070967), 2023-03-10
Supplement: Image_1.pdf [file Image_1.pdf]

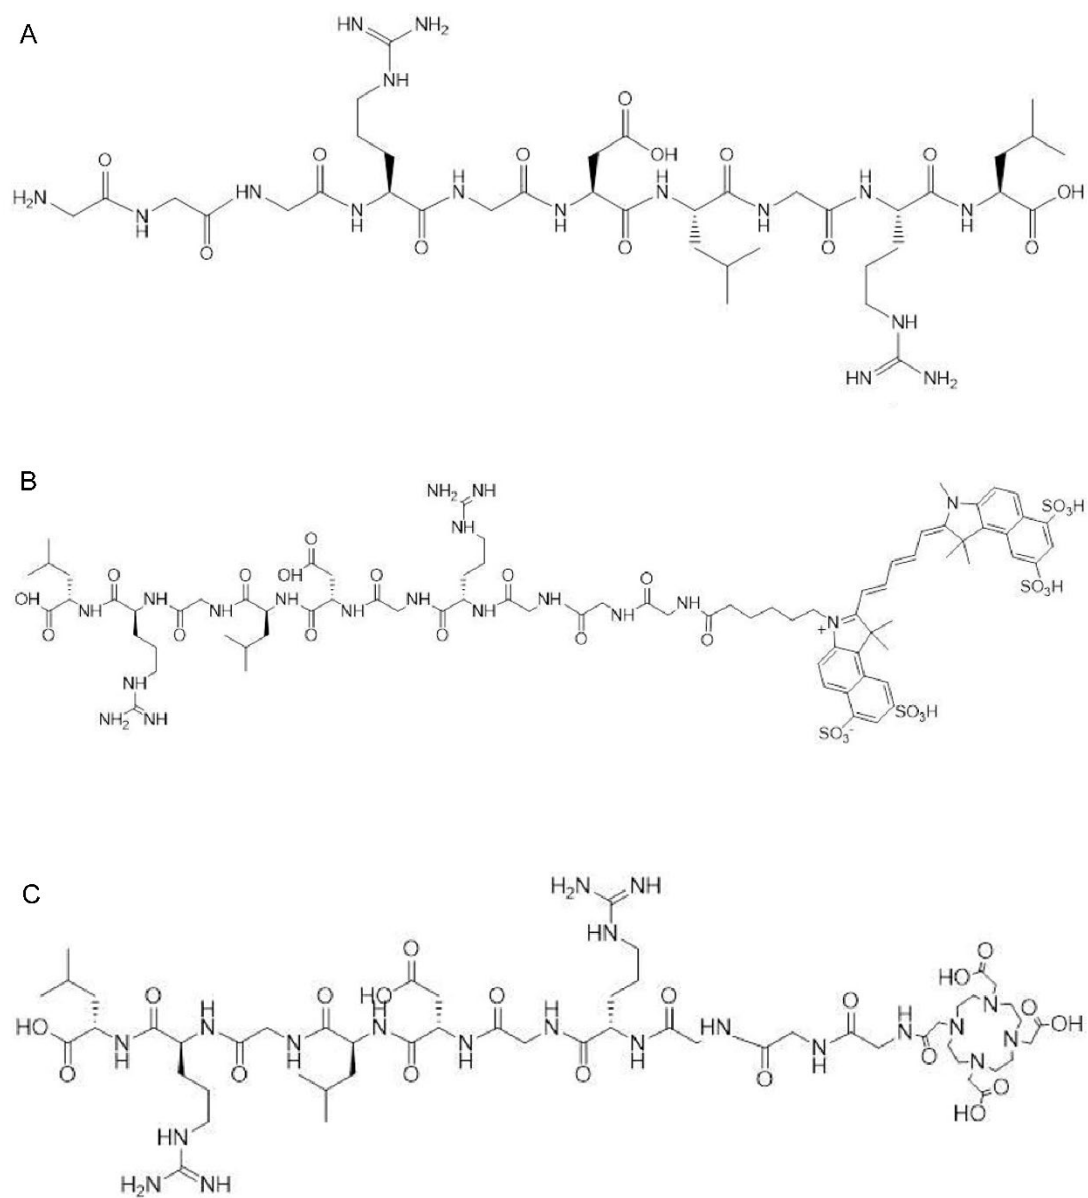

**Figure S1.** The structure of **(A)** peptide G2-SFLAP3, **(B)** G2-SFLAP3-Cy5.5, and **(C)** DOTA-G2-SFLAP3.
